# Supplementary material
Source: publisher figshare collection journal article supplement (https://frontiersin.figshare.com/ndownloader/files/20987694)
Supplement: Supplementary file 1 [file 20987694]

Sample code	year	month	day	Location	Site	Duration	Water	Insect
ARM- Week 1A	2018	5	14	Armindale, Australia	ARM	23hr	0	0
ARM- Week 2B	2018	5	20	Armindale, Australia	ARM	24hr	0	0
ARM- Week 3B	2018	5	29	Armindale, Australia	ARM	24hr	0	0
ARM- Week 4A	2018	6	4	Armindale, Australia	ARM	23hr 30min	0	0
ARM- Week 5B	2018	6	12	Armindale, Australia	ARM	24hr	0	0
ARM- Week 6A	2018	6	18	Armindale, Australia	ARM	24hr	0	0
ARM- Week 7A	2018	6	25	Armindale, Australia	ARM	24hr	0	0
ARM- Week 8B	2018	7	3	Armindale, Australia	ARM	24hr	0	0
ARM- Week 10A	2018	7	16	Armindale, Australia	ARM	24hr 30min	0	0
ARM- Week 11B	2018	7	24	Armindale, Australia	ARM	24hr 15min	0	0
ARM- Week 12B	2018	7	31	Armindale, Australia	ARM	24hr	0	0
ARM- Week 13B	2018	8	8	Armindale, Australia	ARM	26hr 5min	0	0
ARM- Week 8A	2018	7	2	Armindale, Australia	ARM	24hr	1	0
ARM- Week 9B	2018	7	10	Armindale, Australia	ARM	25hr 45 min	1	0
HAI- Week 2A	2018	6	25	Hainich, Germany	HAI	24hr	0	0
HAI- Week 3B	2018	7	3	Hainich, Germany	HAI	24hr	0	0
HAI- Week 11B	2018	8	28	Hainich, Germany	HAI	24hr	0	0
HAI- Week 10A	2018	8	20	Hainich, Germany	HAI	24hr	0	0
HAI- Week 12A	2018	9	3	Hainich, Germany	HAI	24hr	0	0
HAI- Week 1A	2018	6	18	Hainich, Germany	HAI	24hr	0	1
HAI- Week 2B	2018	6	26	Hainich, Germany	HAI	24hr	0	1
HAI- Week 4B	2018	7	10	Hainich, Germany	HAI	24hr	0	1
HAI- Week 5B	2018	7	17	Hainich, Germany	HAI	24hr	0	1
HAI- Week 6A	2018	7	23	Hainich, Germany	HAI	24hr	0	1
HAI- Week 7B	2018	8	1	Hainich, Germany	HAI	24hr	0	1
HAI- Week 8B	2018	8	6	Hainich, Germany	HAI	24hr	0	1
KLA- Week 1A	2018	6	4	Klagenfurt, Austria	KLA	24hr	0	0
KLA- Week 2B	2018	6	12	Klagenfurt, Austria	KLA	24hr	0	0
KLA- Week 4A	2018	6	25	Klagenfurt, Austria	KLA	24hr	0	0
KLA- Week 5B	2018	7	3	Klagenfurt, Austria	KLA	23hr 30min	0	0
KLA- Week 7B	2018	7	17	Klagenfurt, Austria	KLA	24hr	0	0
KLA- Week 8A	2018	7	23	Klagenfurt, Austria	KLA	24hr	0	0
KLA- Week 13B	2018	8	28	Klagenfurt, Austria	KLA	24hr	0	0
KLA- Week 14A	2018	9	3	Klagenfurt, Austria	KLA	24hr	0	0
KLA- Week 10B	2018	8	7	Klagenfurt, Austria	KLA	24hr	0	1
KLA- Week 11A	2018	8	13	Klagenfurt, Austria	KLA	24hr	0	1
KLA- Week 12B	2018	8	21	Klagenfurt, Austria	KLA	24hr	0	1
KLA- Week 14B	2018	9	4	Klagenfurt, Austria	KLA	24hr	0	1
KLA- Week 15B	2018	9	11	Klagenfurt, Austria	KLA	24hr	0	1
KLA- Week 3B	2018	6	19	Klagenfurt, Austria	KLA	24hr	0	1
KLA- Week 5A	2018	7	2	Klagenfurt, Austria	KLA	23hr 30min	0	1
KLA- Week 6B	2018	7	10	Klagenfurt, Austria	KLA	25hr 30 min	0	1
KLA- Week 8B	2018	7	24	Klagenfurt, Austria	KLA	24hr	0	1
KLA- Week 9A	2018	7	30	Klagenfurt, Austria	KLA	24hr	0	1
ZAC- Week 1A	2018	6	7	Zackenberg, Greenland	ZAC	24hr	0	0
ZAC- Week 2A	2018	6	14	Zackenberg, Greenland	ZAC	28hr5min	0	0
ZAC- Week 3B	2018	6	22	Zackenberg, Greenland	ZAC	24hr	0	0
ZAC- Week 5B	2018	7	6	Zackenberg, Greenland	ZAC	24hr	0	0
ZAC- Week 7A	2018	7	19	Zackenberg, Greenland	ZAC	24hr	0	0
ZAC- Week 8A	2018	7	26	Zackenberg, Greenland	ZAC	24hr	0	0
ZAC- Week 9B	2018	8	3	Zackenberg, Greenland	ZAC	24hr	0	0
ZAC- Week 11B	2018	8	18	Zackenberg, Greenland	ZAC	24hr	0	0
ZAC- Week 12B	2018	8	25	Zackenberg, Greenland	ZAC	24hr	0	0
ZAC- Week 14A	2018	9	6	Zackenberg, Greenland	ZAC	24hr	0	0
ZAC- Week 3A	2018	6	21	Zackenberg, Greenland	ZAC	24hr	1	0
ZAC- Week 11A	2018	8	17	Zackenberg, Greenland	ZAC	24hr	0	1
ZAC- Week 6A	2018	7	12	Zackenberg, Greenland	ZAC	24hr	0	1
ZAC- Week 7B	2018	7	20	Zackenberg, Greenland	ZAC	24hr	0	1
ZUR- Week 2A	2018	7	10	Zurich, Switzerland	ZUR	24hr	0	0
ZUR- Week 2B	2018	7	11	Zurich, Switzerland	ZUR	24hr	0	0
ZUR- Week 3A	2018	7	17	Zurich, Switzerland	ZUR	24hr	0	0
ZUR- Week 3B	2018	7	18	Zurich, Switzerland	ZUR	24hr	0	0
ZUR- Week 5A	2018	7	29	Zurich, Switzerland	ZUR	24hr	0	0
ZUR- Week 6A	2018	8	7	Zurich, Switzerland	ZUR	24hr	0	0
ZUR- Week 7B	2018	8	15	Zurich, Switzerland	ZUR	24hr	0	0
ZUR- Week 9B	2018	8	29	Zurich, Switzerland	ZUR	24hr	0	0
ZUR- Week 12A	2018	9	18	Zurich, Switzerland	ZUR	24hr	0	0
ZUR- Week 10B	2018	9	5	Zurich, Switzerland	ZUR	24hr	0	1
ZUR- Week 11B	2018	9	13	Zurich, Switzerland	ZUR	24hr	0	1
ZUR- Week 1A	2018	7	3	Zurich, Switzerland	ZUR	24hr	1	1
ZUR- Week 4A	2018	7	24	Zurich, Switzerland	ZUR	24hr	0	1
ZUR- Week 5B	2018	7	30	Zurich, Switzerland	ZUR	24hr 5min	0	1
ZUR- Week 6B	2018	8	8	Zurich, Switzerland	ZUR	24hr	0	1
ZUR- Week 8B	2018	8	21	Zurich, Switzerland	ZUR	24hr	0	1
ZUR- Week 9A	2018	8	28	Zurich, Switzerland	ZUR	24hr	0	1
